# Supplementary material for: Health-related quality of life and symptoms in patients with rituximab-refractory indolent non-Hodgkin lymphoma treated in the phase III GADOLIN study with obinutuzumab plus bendamustine versus bendamustine alone
Source: Springer Nature journal article supplement (doi:10.1007/s00277-016-2878-5), 2016-11-30
Supplement: MOESM1 [file 11103620]

## **Supplementary Material**

**Health-related quality of life and symptoms in patients with rituximab-refractory, indolent non-Hodgkin lymphoma treated in the phase III GADOLIN study with obinutuzumab plus bendamustine versus bendamustine alone**

***Annals of Hematology***

**Bruce D. Cheson<sup>1</sup>, Peter C. Trask<sup>2</sup>, John G. Gribben<sup>3</sup>, Natalie Dimier<sup>4</sup>, Eva Kimby<sup>5</sup>, Pieterella J. Lugtenburg<sup>6</sup>, Catherine Thieblemont<sup>7</sup>, Elisabeth Wassner-Fritsch<sup>8</sup>, Aino Launonen,<sup>8</sup> and Laurie H. Sehn<sup>9</sup>**

**Corresponding author:** Bruce D. Cheson

Georgetown University Hospital, Lombardi Comprehensive Cancer Center, 3800 Reservoir Road NW, Washington, DC  
20007

E-mail: [bdc4@georgetown.edu](mailto:bdc4@georgetown.edu)

**Supplementary Table 1** FACT-Lym scores by visit: ITT population

| FACT-Lym questionnaire subscale <sup>a-c</sup> | B (n = 202)  |                                | G-B (n = 194) |                                |
|------------------------------------------------|--------------|--------------------------------|---------------|--------------------------------|
|                                                | Mean (SD)    | Mean change from baseline (SD) | Mean (SD)     | Mean change from baseline (SD) |
| <b>PWB</b>                                     |              |                                |               |                                |
| Baseline                                       | 22.63 (5.16) | N/A                            | 22.72 (4.65)  | N/A                            |
| C5, D1                                         | 20.96 (5.28) | -1.99 (5.07)                   | 21.97 (5.20)  | -0.77 (4.22)                   |
| Study treatment completion/early withdrawal    | 22.26 (5.11) | -0.96 (5.23)                   | 22.16 (5.58)  | -0.63 (4.71)                   |
| Follow-up visit 4, 6 months post-EOI           | 24.16 (3.40) | 0.31 (3.74)                    | 24.34 (3.64)  | 0.77 (3.62)                    |
| Follow-up visit 8, 12 months post-EOI          | 24.36 (3.86) | 0.50 (4.26)                    | 24.60 (4.20)  | 0.66 (4.60)                    |
| <b>FWB</b>                                     |              |                                |               |                                |
| Baseline                                       | 18.00 (6.18) | N/A                            | 17.84 (6.07)  | N/A                            |
| C5, D1                                         | 17.62 (5.80) | -0.88 (5.04)                   | 18.58 (6.12)  | 0.67 (5.48)                    |
| Study treatment completion/early withdrawal    | 17.79 (5.96) | -0.58 (5.68)                   | 18.09 (6.44)  | 0.00 (5.35)                    |
| Follow-up visit 4, 6 months post-EOI           | 19.41 (5.10) | 0.81 (4.65)                    | 19.95 (5.73)  | 1.58 (5.05)                    |
| Follow-up visit 8, 12 months post-EOI          | 19.34 (5.19) | 1.11 (4.82)                    | 19.95 (5.96)  | 1.96 (6.63)                    |
| <b>SWB</b>                                     |              |                                |               |                                |

|                                             |              |              |               |              |
|---------------------------------------------|--------------|--------------|---------------|--------------|
| Baseline                                    | 22.14 (5.58) | N/A          | 22.17 (5.48)  | N/A          |
| C5, D1                                      | 21.78 (5.35) | -0.82 (3.45) | 21.85 (4.69)  | -0.39 (4.40) |
| Study treatment completion/early withdrawal | 21.53 (5.48) | -1.06 (4.69) | 21.56 (5.86)  | -0.91 (3.62) |
| Follow-up visit 4, 6 months post-EOI        | 22.30 (5.47) | -0.14 (2.84) | 22.11 (5.30)  | -0.07 (4.81) |
| Follow-up visit 8, 12 months post-EOI       | 23.11 (3.75) | 0.13 (2.31)  | 21.95 (5.47)  | -0.14 (5.53) |
| EWB                                         |              |              |               |              |
| Baseline                                    | 17.43 (4.44) | N/A          | 17.73 (4.33)  | N/A          |
| C5, D1                                      | 18.18 (4.19) | 0.32 (3.11)  | 18.28 (4.72)  | 0.50 (3.59)  |
| Study treatment completion/early withdrawal | 18.26 (4.05) | 0.53 (3.59)  | 18.24 (4.65)  | 0.48 (3.97)  |
| Follow-up visit 4, 6 months post-EOI        | 18.74 (3.38) | 0.94 (3.42)  | 19.18 (3.96)  | 0.97 (3.29)  |
| Follow-up visit 8, 12 months post-EOI       | 18.07 (3.95) | -0.08 (3.98) | 19.14 (4.14)  | 0.84 (3.01)  |
| FACT-Lym LYMS                               |              |              |               |              |
| Baseline                                    | 44.88 (9.56) | N/A          | 45.55 (9.18)  | N/A          |
| C5, D1                                      | 46.15 (8.82) | 0.88 (6.87)  | 46.73 (9.84)  | 1.26 (6.10)  |
| Study treatment completion/early withdrawal | 47.36 (9.33) | 1.88 (7.18)  | 46.13 (10.24) | 0.79 (7.99)  |
| Follow-up visit 4, 6 months post-EOI        | 48.32 (8.48) | 2.57 (6.65)  | 50.32 (7.74)  | 3.45 (6.36)  |
| Follow-up visit 8, 12 months post-EOI       | 48.36 (7.80) | 2.53 (7.35)  | 50.41 (7.79)  | 3.23 (6.50)  |

| FACT-G                                      |                |               |                |               |
|---------------------------------------------|----------------|---------------|----------------|---------------|
| Baseline                                    | 80.07 (15.87)  | N/A           | 80.61 (16.19)  | N/A           |
| C5, D1                                      | 78.41 (15.88)  | -3.28 (11.72) | 80.56 (16.92)  | -0.04 (11.37) |
| Study treatment completion/early withdrawal | 79.45 (15.46)  | -2.23 (13.80) | 79.91 (18.33)  | -1.08 (11.87) |
| Follow-up visit 4, 6 months post-EOI        | 84.91 (13.38)  | 2.28 (10.10)  | 85.62 (15.21)  | 3.33 (11.52)  |
| Follow-up visit 8, 12 months post-EOI       | 84.74 (12.84)  | 1.63 (11.44)  | 85.53 (15.86)  | 2.98 (15.28)  |
| FACT-Lym TOI                                |                |               |                |               |
| Baseline                                    | 84.79 (19.01)  | N/A           | 84.53 (19.03)  | N/A           |
| C5, D1                                      | 84.40 (17.76)  | -1.55 (15.60) | 86.82 (19.82)  | 2.23 (14.34)  |
| Study treatment completion/early withdrawal | 86.32 (18.95)  | -0.40 (17.90) | 85.82 (20.75)  | 0.44 (16.73)  |
| Follow-up visit 4, 6 months post-EOI        | 90.44 (17.52)  | 3.34 (12.36)  | 94.60 (15.79)  | 6.56 (13.08)  |
| Follow-up visit 8, 12 months post-EOI       | 92.07 (14.95)  | 4.14 (14.46)  | 94.96 (16.10)  | 6.92 (16.37)  |
| FACT-Lym TOT                                |                |               |                |               |
| Baseline                                    | 124.86 (23.63) | N/A           | 126.00 (23.96) | N/A           |
| C5, D1                                      | 124.48 (23.12) | -2.37 (16.63) | 127.26 (25.93) | 1.47 (15.44)  |
| Study treatment completion/early withdrawal | 126.99 (23.40) | -0.11 (18.91) | 125.96 (27.31) | 0.25 (18.50)  |
| Follow-up visit 4, 6 months post-EOI        | 133.36 (20.38) | 5.08 (14.88)  | 135.89 (21.92) | 6.85 (15.59)  |

|                                       |                |              |                |              |
|---------------------------------------|----------------|--------------|----------------|--------------|
| Follow-up visit 8, 12 months post-EOI | 133.11 (19.61) | 4.19 (17.76) | 135.97 (22.53) | 6.41 (20.02) |
|---------------------------------------|----------------|--------------|----------------|--------------|

---

*B* bendamustine, *C* cycle, *D* day, *EOI* end of induction, *EWB* emotional well-being, *FACT-Lym* Functional Assessment of Cancer Treatment-Lymphoma questionnaire, *FACT-G* FACT-General, *FACT-Lym LYMS* FACT-Lym lymphoma-specific subscale, *FACT-Lym TOI* FACT-Lym Trial Outcome Index, *FACT-Lym TOT* FACT-Lym total score, *FWB* functional well-being, *G-B* obinutuzumab plus bendamustine, *ITT* intent-to-treat, *PD* progression of disease, *PRO* patient-reported outcome, *PWB* physical well-being, *SWB* social/family well-being

<sup>a</sup> Patients followed the same schedule of PRO assessments during induction treatment and follow-up regardless of treatment arm, and no PRO assessment was scheduled after PD

<sup>b</sup> The FACT-Lym questionnaire was administered on D1 of C1, 3 and 5 during treatment, at the EOI treatment and bi-monthly for 2 years (where non-progressing G-B patients received G maintenance and B patients were observed), and annually during extended follow-up until PD

<sup>c</sup> For patients in the G-B arm, follow-up assessments occurred during G maintenance treatment
